# Supplementary material for: (44) トマト斑点病の感染・発病における温度と濡れ時間の影響(平成19年度日本植物病理学会大会講演要旨)
Source: MDPI journal article supplement (doi:10.3390/cells11152450), 2007-08-25

**Supplementary Figure S1. Evaluation of the unique peptides and proteins identified in the pseudo single-cell by the SLB-SCP.** A) Distribution of the unique peptides identified in the single-cell samples (error rate: 1%, expect score  $\leq 0.001$ , IPM  $\geq 0.01$ , idotp  $\geq 0.5$ ) based on their mass deviation from the theoretical values. B) Comparison of the unique peptides and proteins identified in the pseudo single-cell samples with the pseudo 50-cells samples (bulk scale).

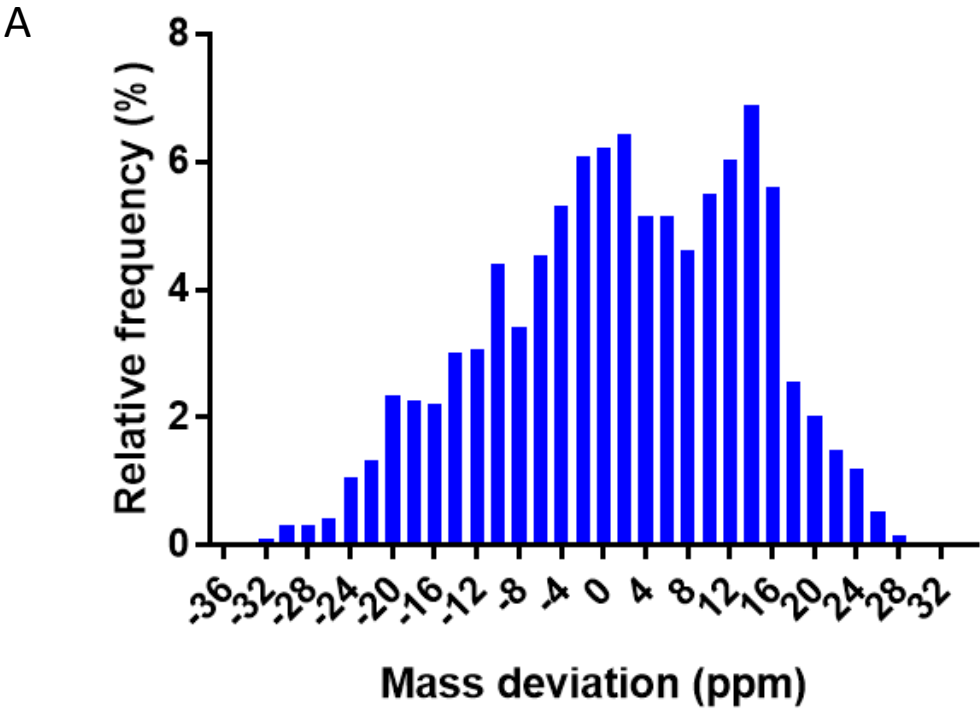

B Unique peptides

Unique proteins

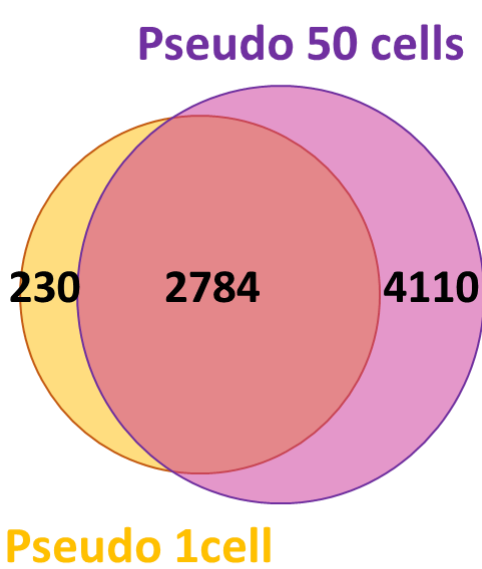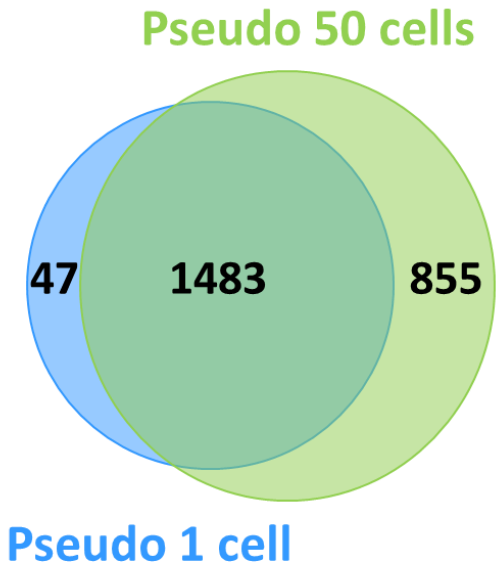

**Supplementary Figure S2. Correlation plots of protein intensity data from single-cell (100 pg) and 500-cells (50 ng) vs the bulk sample (1 μg).** A) Single-cell vs the bulk sample. B) 500-cells vs the bulk sample.

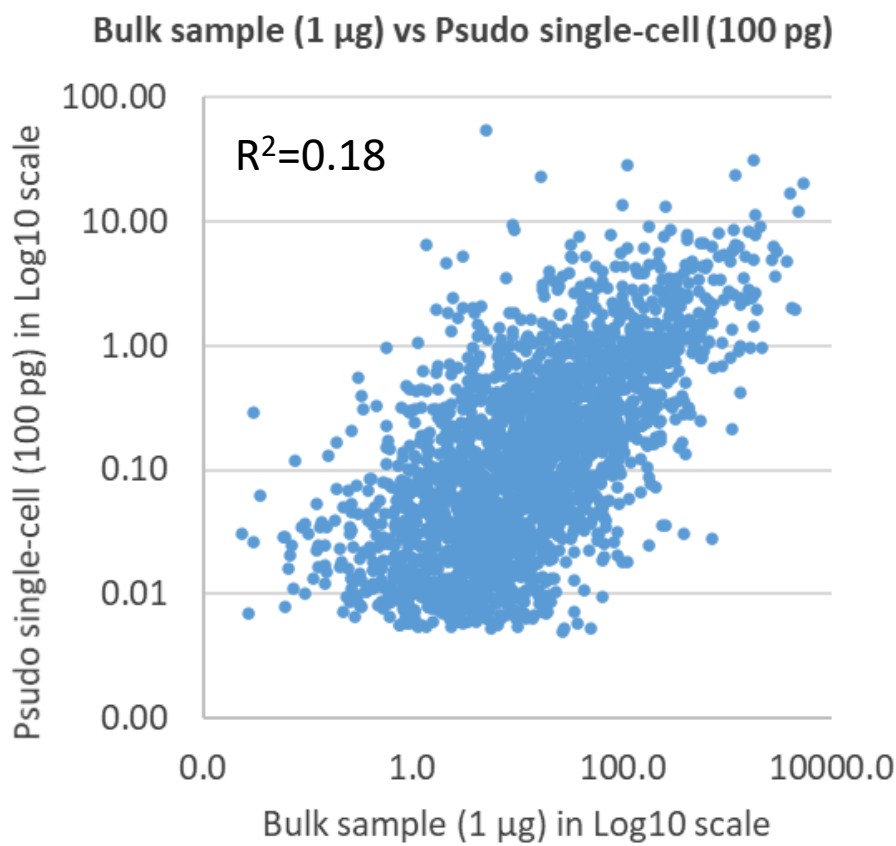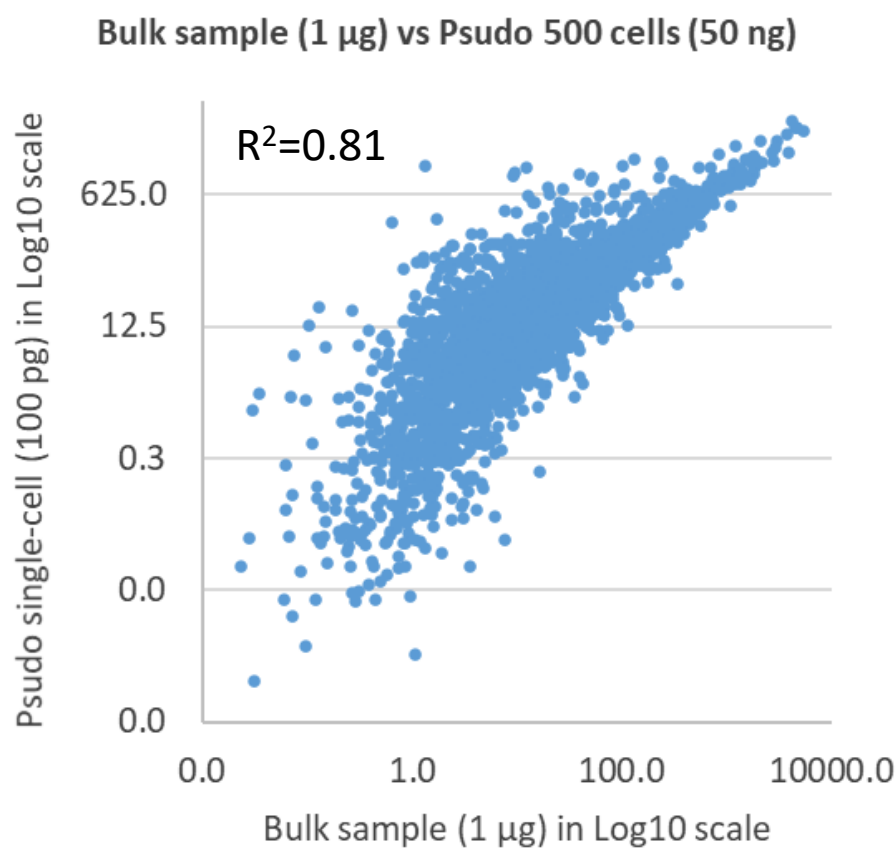

Supplementary Figure S3. Hierarchical clustering heatmap of protein intensities (IPM) for all proteins identified in the single cells of HPDE and PANC-1

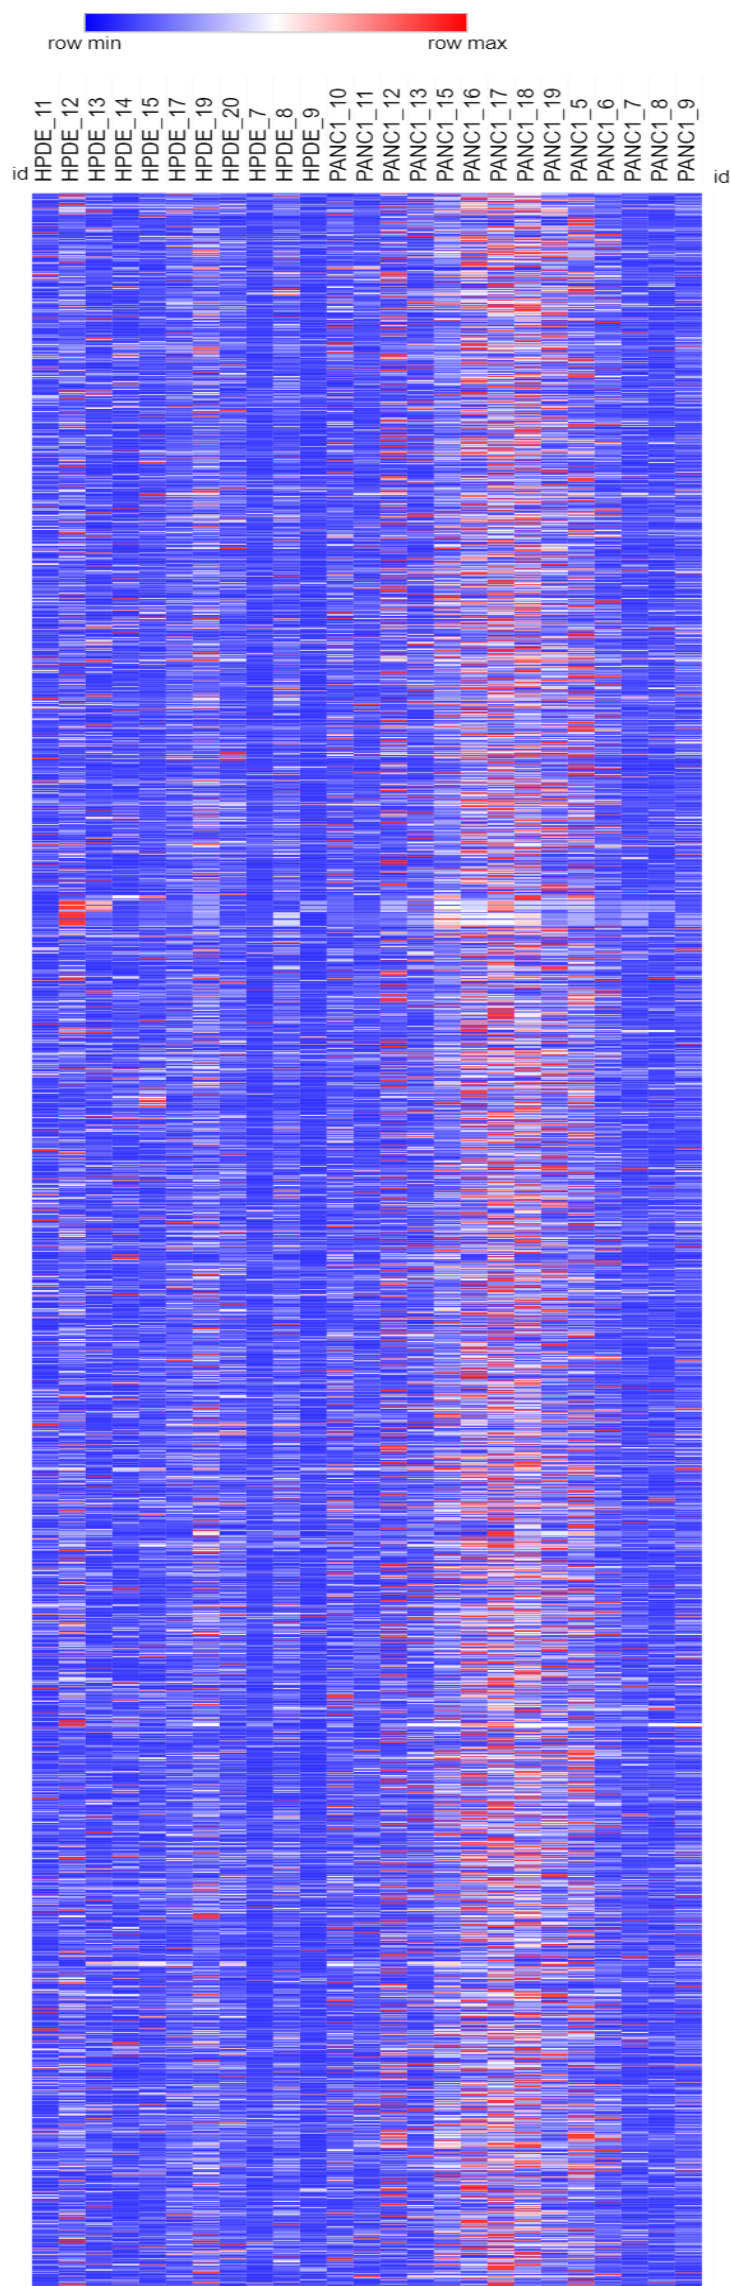

Supplement: s1 [file s1]
